# Supplementary material for: Unique topological motifs in two Cd(ii)-coordination polymers: mutual-embedded 2D bilayers, 3D polythreaded structures, self-penetrated networks and 2D → 2D interpenetrated homochiral bilayers
Source: Royal Society of Chemistry journal article supplement (doi:10.1039/c5ce01648g), 2015-01-01
Supplement: c5ce01648g1.pdf [file c5ce01648g1.pdf]

**Unique topological motifs in two Cd (II)-coordination polymers:  
mutual-embedded 2D bilayers, 3D polythreaded structures, self-  
penetrated network and 2D→2D interpenetrated homochiral bilayers**

**Guo-Wang Xu<sup>a, b</sup>, Ya-Pan Wu<sup>a</sup>, Hai-Bin Wang<sup>a</sup>, Ye-Nan Wang<sup>a</sup>, Dong-Sheng  
Li<sup>\*a</sup>, Yun-Ling Liu<sup>\*c</sup>**

<sup>a</sup>*College of Materials and Chemical Engineering, Hubei Provincial Collaborative  
Innovation Center for New Energy Microgrid, China Three Gorges University,  
Yichang, 443002, China*

<sup>b</sup>*College of Science, China Three Gorges University, Yi chang, 443002, China*

<sup>c</sup>*State Key Laboratory of Inorganic Synthesis and Preparative Chemistry, College of  
Chemistry, Jilin University, Changchun 130012, P. R. China.*

\* Corresponding authors

E-mail address: lidongsheng1@126.com (D.-S. Li), Tel./Fax: +86-717-6397506;

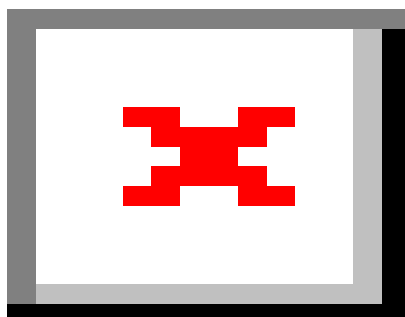

**Scheme S1.** Structures of the ligands used in this work.

**(a)**

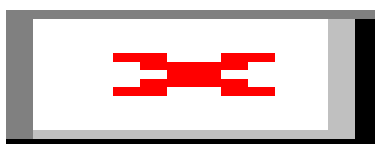

**(b)**

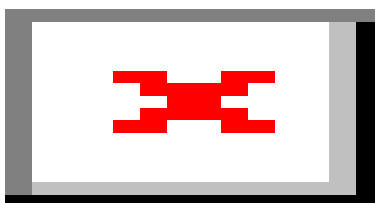

**Scheme S 2.** The two conformation and coordination modes of *m*-pdoa<sup>2-</sup> in **1** **(a)** and **2** **(b)**.

**Table S1.** Selected bond lengths (Å) and bond angles (°) for **1** and **2**.

---

| <b>1</b>            |           |                    |            |
|---------------------|-----------|--------------------|------------|
| Cd(1)-O(8)          | 2.250(3)  | N(1)-Cd(1)-O(2)    | 91.48(8)   |
| Cd(1)-N(3)#1        | 2.277(2)  | O(8)-Cd(1)-O(1)    | 106.08(9)  |
| Cd(1)-O(7)          | 2.324(3)  | N(3)#1-Cd(1)-O(1)  | 87.99(8)   |
| Cd(1)-N(1)          | 2.338(2)  | O(7)-Cd(1)-O(1)    | 83.83(9)   |
| Cd(1)-O(2)          | 2.354(2)  | N(1)-Cd(1)-O(1)    | 138.41(8)  |
| Cd(1)-O(1)          | 2.541(2)  | O(2)-Cd(1)-O(1)    | 53.22(7)   |
| Cd(2)-O(6)#2        | 2.248(2)  | O(6)#2-Cd(2)-N(6)# | 92.90(10)  |
| Cd(2)-N(6)#1        | 2.278(3)  | O(6)#2-Cd(2)-N(4)  | 90.95(10)  |
| Cd(2)-N(4)          | 2.312(3)  | N(6)#1-Cd(2)-N(4)  | 127.05(10) |
| Cd(2)-O(13)         | 2.372(3)  | O(6)#2-Cd(2)-O(13) | 91.41(9)   |
| Cd(2)-N(7)          | 2.405(3)  | N(6)#1-Cd(2)-O(13) | 143.10(9)  |
| Cd(2)-O(12)         | 2.432(3)  | N(4)-Cd(2)-O(13)   | 89.46(10)  |
| O(8)-Cd(1)-N(3)#1   | 98.40(10) | O(6)#2-Cd(2)-N(7)  | 177.20(10) |
| O(8)-Cd(1)-O(7)     | 169.81(9) | N(6)#1-Cd(2)-N(7)  | 89.85(11)  |
| N(3)#1-Cd(1)-O(7)   | 84.06(9)  | N(4)-Cd(2)-N(7)    | 86.95(11)  |
| O(8)-Cd(1)-N(1)     | 89.30(9)  | O(13)-Cd(2)-N(7)   | 86.72(11)  |
| N(3)#1-Cd(1)-N(1)   | 128.51(9) | O(6)#2-Cd(2)-O(12) | 96.16(11)  |
| O(7)-Cd(1)-N(1)     | 81.51(9)  | N(6)#1-Cd(2)-O(12) | 88.96(10)  |
| O(8)-Cd(1)-O(2)     | 84.67(9)  | N(4)-Cd(2)-O(12)   | 142.93(10) |
| N(3)#1-Cd(1)-O(2)   | 139.77(8) | O(13)-Cd(2)-O(12)  | 54.14(10)  |
| O(7)-Cd(1)-O(2)     | 99.89(9)  | N(7)-Cd(2)-O(12)   | 84.43(13)  |
| <b>2</b>            |           |                    |            |
| Cd(1)-O(1)          | 2.298(12) | N(2)#1-Cd(1)-N(1)  | 97.7(3)    |
| Cd(1)-N(2)#1        | 2.302(11) | O(6)#2-Cd(1)-N(1)  | 105.4(4)   |
| Cd(1)-O(6)#2        | 2.302(11) | O(1)-Cd(1)-O(7)    | 86.8(4)    |
| Cd(1)-N(1)          | 2.383(10) | N(2)#1-Cd(1)-O(7)  | 80.9(3)    |
| Cd(1)-O(7)          | 2.411(9)  | O(6)#2-Cd(1)-O(7)  | 82.3(4)    |
| Cd(1)-O(2)          | 2.571(10) | N(1)-Cd(1)-O(7)    | 171.3(3)   |
| Cd(1)-O(5)#2        | 2.619(9)  | O(1)-Cd(1)-O(2)    | 53.4(3)    |
| O(1)-Cd(1)-N(2)#1   | 146.5(3)  | N(2)#1-Cd(1)-O(2)  | 93.9(3)    |
| O(1)-Cd(1)-O(6)#2   | 85.6(5)   | O(6)#2-Cd(1)-O(2)  | 136.8(5)   |
| N(2)#1-Cd(1)-O(6)#2 | 122.9(4)  | N(1)-Cd(1)-O(2)    | 89.3(3)    |
| O(1)-Cd(1)-N(1)     | 89.8(4)   | O(7)-Cd(1)-O(2)    | 82.3(3)    |
| O(1)-Cd(1)-O(5)#2   | 129.5(4)  | N(1)-Cd(1)-O(5)#2  | 84.5(3)    |
| N(2)#1-Cd(1)-O(5)#2 | 83.9(4)   | O(7)-Cd(1)-O(5)#2  | 103.8(3)   |
| O(6)#2-Cd(1)-O(5)#2 | 48.6(5)   | O(2)-Cd(1)-O(5)#2  | 173.1(4)   |

---

<sup>a</sup> Symmetry codes for **1**: #1: x,y+1,z ; #2: x,y-1,z; #3: x-3/2,-y+3/2,z-1/2; #4: x+3/2,-y+3/2,z+1/2.

<sup>b</sup>Symmetry codes for **2**: #1:  $x-1/2,y-1/2,z$ ; #2:  $x-1/2,y+1/2,z$ ; #3:  $x+1/2,y+1/2,z$ ; #4:  $x+1/2,y-1/2,z$ .

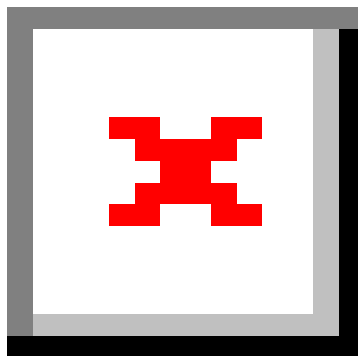

Fig.S1. Two kinds of windows among the compound **1**.

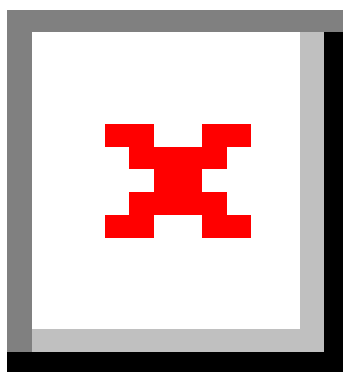

Fig.S2. 3D structure of **2** connected by H-bond.

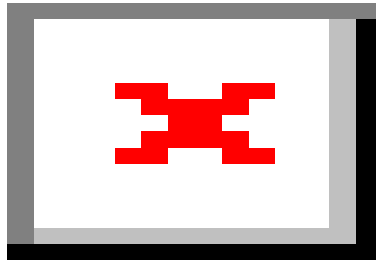

Fig.S3 X-ray diffraction patterns of **1**.

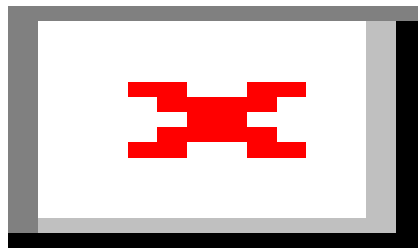

Fig.S4.X-ray diffraction patterns of **2**.

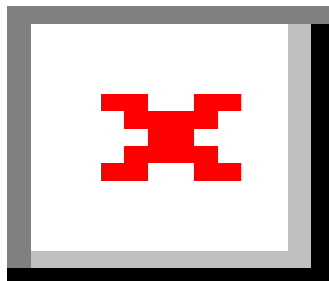

Fig.S5. TGA curve of **1** and **2**.

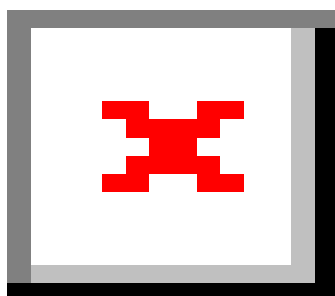

**Fig. S6** Photoluminescence emission spectra of **1**(green) and **2** (blue) at room temperature.
